# Supplementary material for: Influence of cyclodextrin on the UCST- and LCST-behavior of poly(2-methacrylamido-caprolactam)-co-(N,N-dimethylacrylamide)
Source: publisher site journal article supplement (doi:10.3762/bjoc.10.203), 2014-08-21
Supplement: Additional file 1 [file 1860-5397-10-203-S1.pdf]

**Supporting Information**  
**for**  
**Influence of cyclodextrin on the UCST- and LCST-**  
**behavior of poly(2-methacrylamido-caprolactam)-co-(*N,N*-**  
**dimethylacrylamide)**

Alexander Burkhart, Helmut Ritter\*

Address: Institute of Organic Chemistry and Macromolecular Chemistry, Heinrich-Heine-University Duesseldorf, Universitaetsstrasse 1, D-40225 Duesseldorf, Germany, Fax: (+49) 211-811-5840

Email: Helmut Ritter\* – h.ritter@uni-duesseldorf.de

\* Corresponding author

**Characterization data of intermediates and copolymers including <sup>1</sup>H NMR and <sup>13</sup>C NMR spectra, turbidity- and DLS-measurements.**

**Content:**

- Turbidity measurement of copolymer **6b**.
- Determination of the hydrodynamic diameter of copolymer **6a**.
- <sup>1</sup>H NMR spectrum of 2-methacrylamido-caprolactam (**4**).
- <sup>13</sup>C NMR spectrum of 2-methacrylamido-caprolactam (**4**).
- IR spectrum of 2-methacrylamido-caprolactam (**4**) in solid state.
- <sup>1</sup>H NMR spectrum of poly(2-methacrylamido-caprolactam)-co-(*N,N*-dimethylacrylamide) **6b**.
- IR spectrum of poly(2-methacrylamido-caprolactam)-co-(*N,N*-dimethylacrylamide) **6b** in the solid state.
- <sup>1</sup>H NMR spectra of complex between  $\alpha$ -amino- $\epsilon$ -caprolactam (**2**) and RAMEB-CD for the Job plot analysis.

## Turbidity measurement of copolymer **6b**

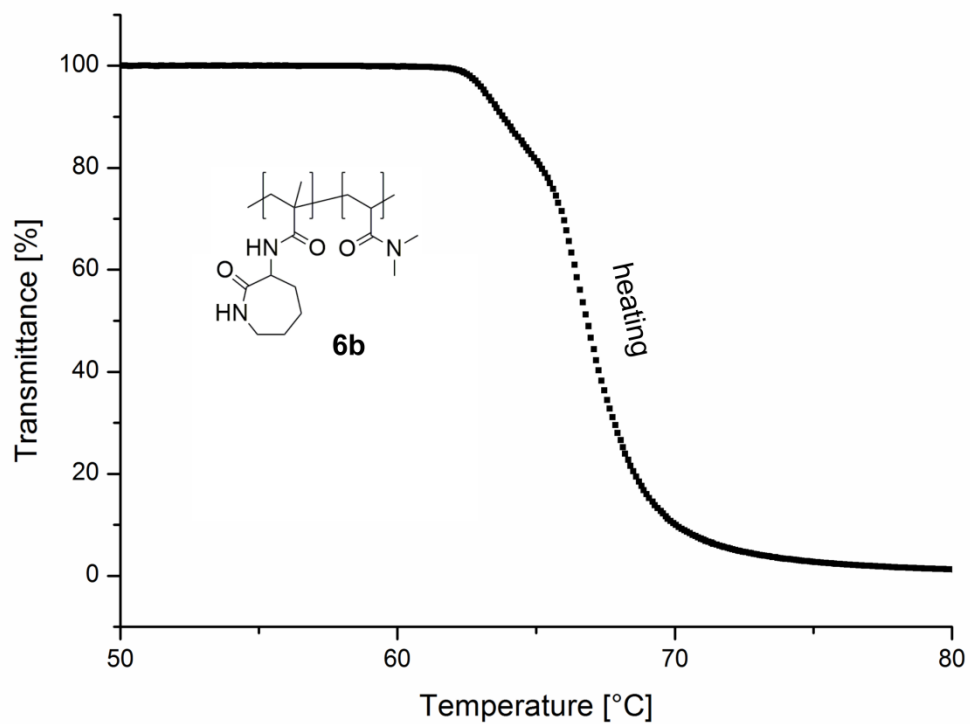

**Figure S1:** LCST measurements of copolymer **6b** in water upon heating of 10 mg/ml at a heating rate of  $1\text{ }^{\circ}\text{C min}^{-1}$ .

## Determination of the hydrodynamic diameter of copolymer **6a**

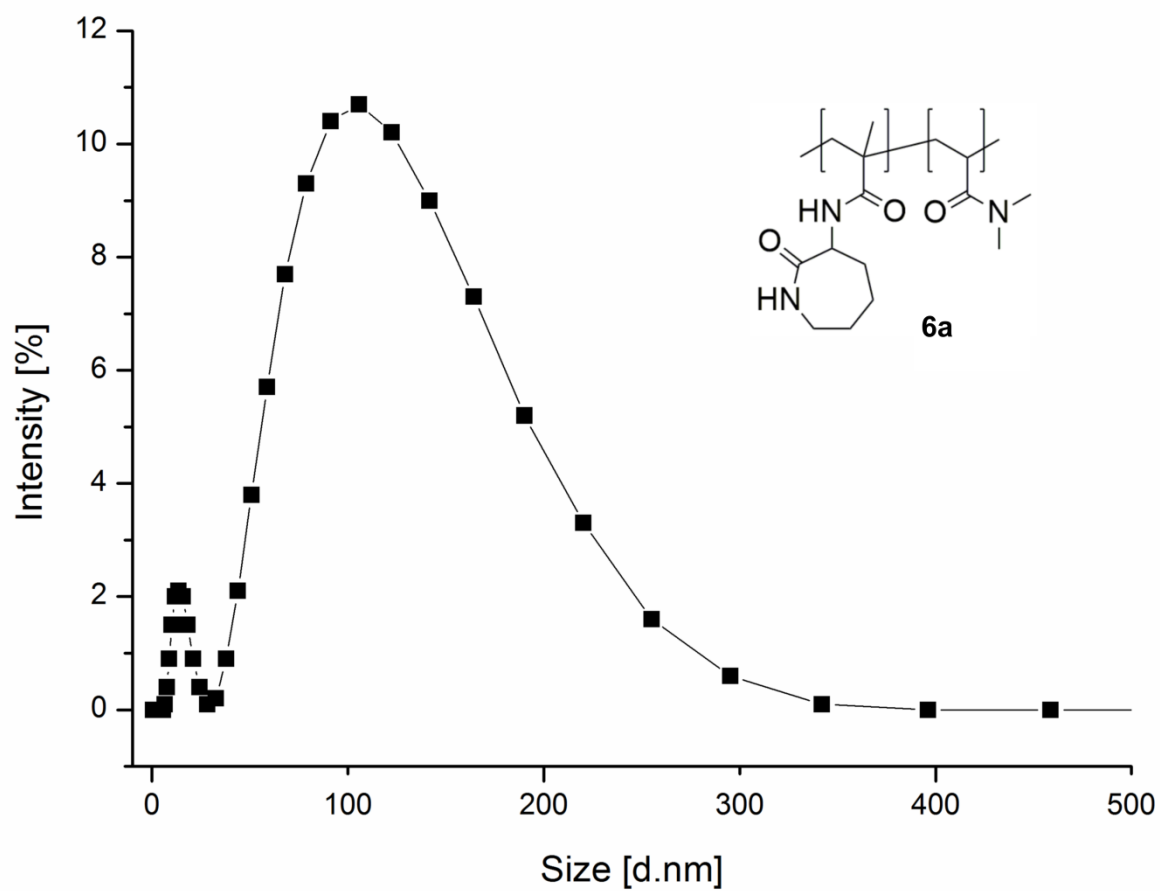

**Figure S2:** Hydrodynamic diameters of **6a** in ethanol ( $2 \text{ mg ml}^{-1}$ ) at  $20 \text{ }^\circ\text{C}$ .

$^1\text{H}$  NMR spectrum of 2-methacrylamido-caprolactam (**4**)

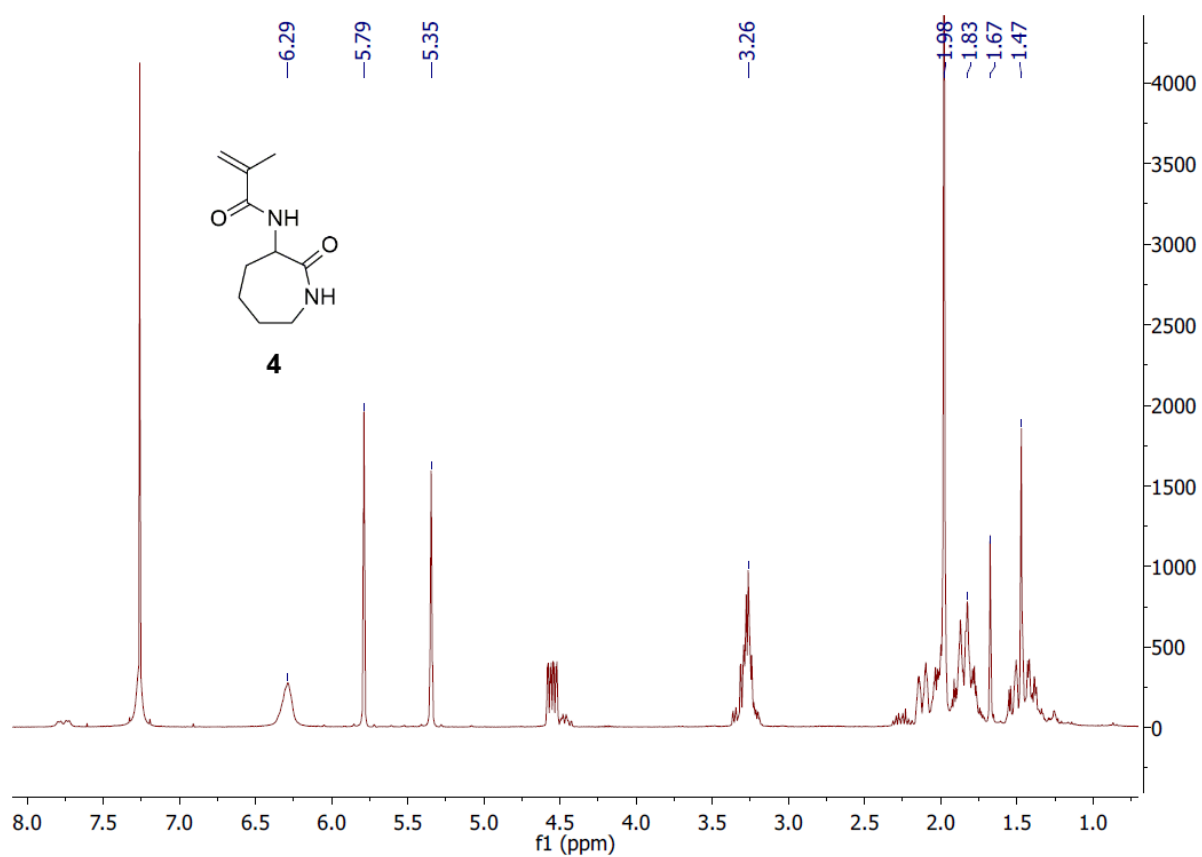

**Figure S3:**  $^1\text{H}$  NMR spectrum of 2-methacrylamido-caprolactam (**4**) in  $\text{CDCl}_3$ .

$^{13}\text{C}$  NMR spectrum of 2-methacrylamido-caprolactam (**4**)

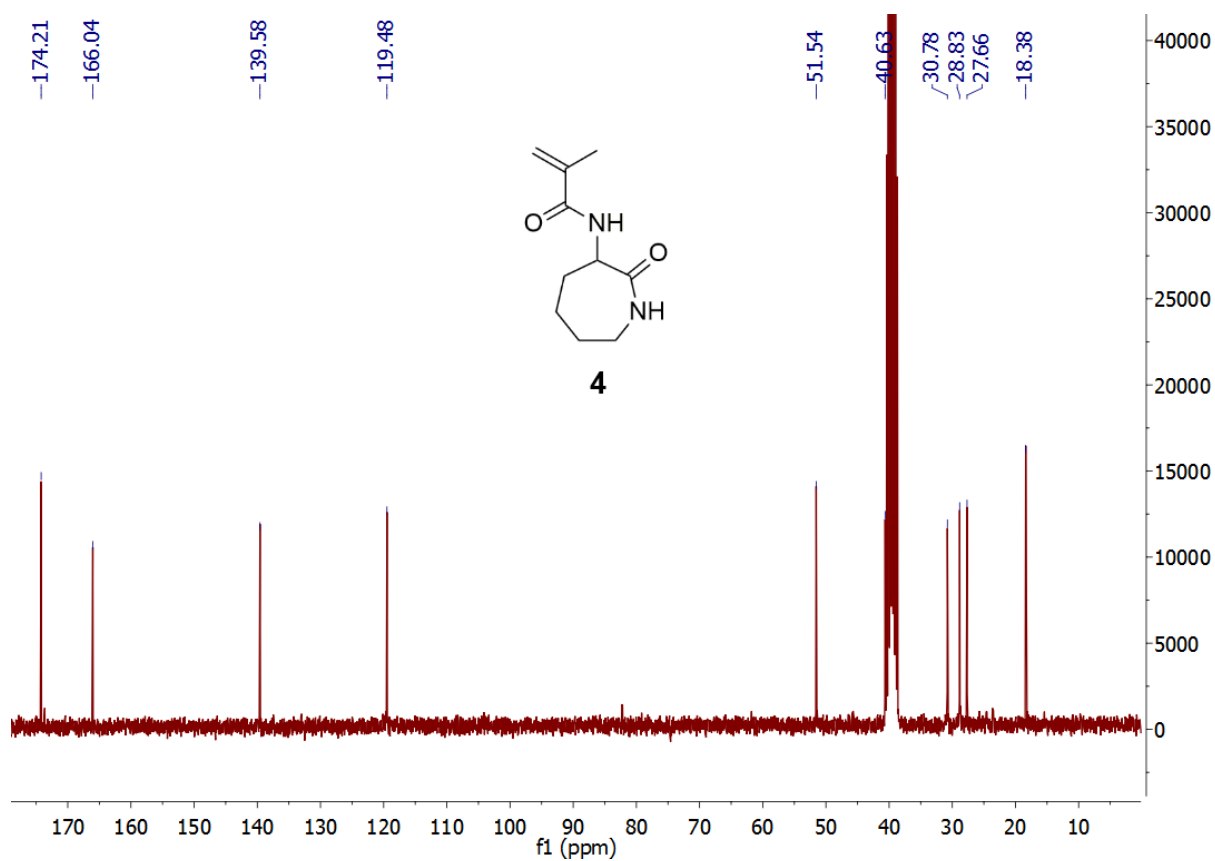

**Figure S4:**  $^{13}\text{C}$  NMR spectrum of 2-methacrylamido-caprolactam (**4**) in dimethylsulfoxide- $d_6$ .

IR spectrum of 2-methacrylamido-caprolactam (**4**) in the solid state

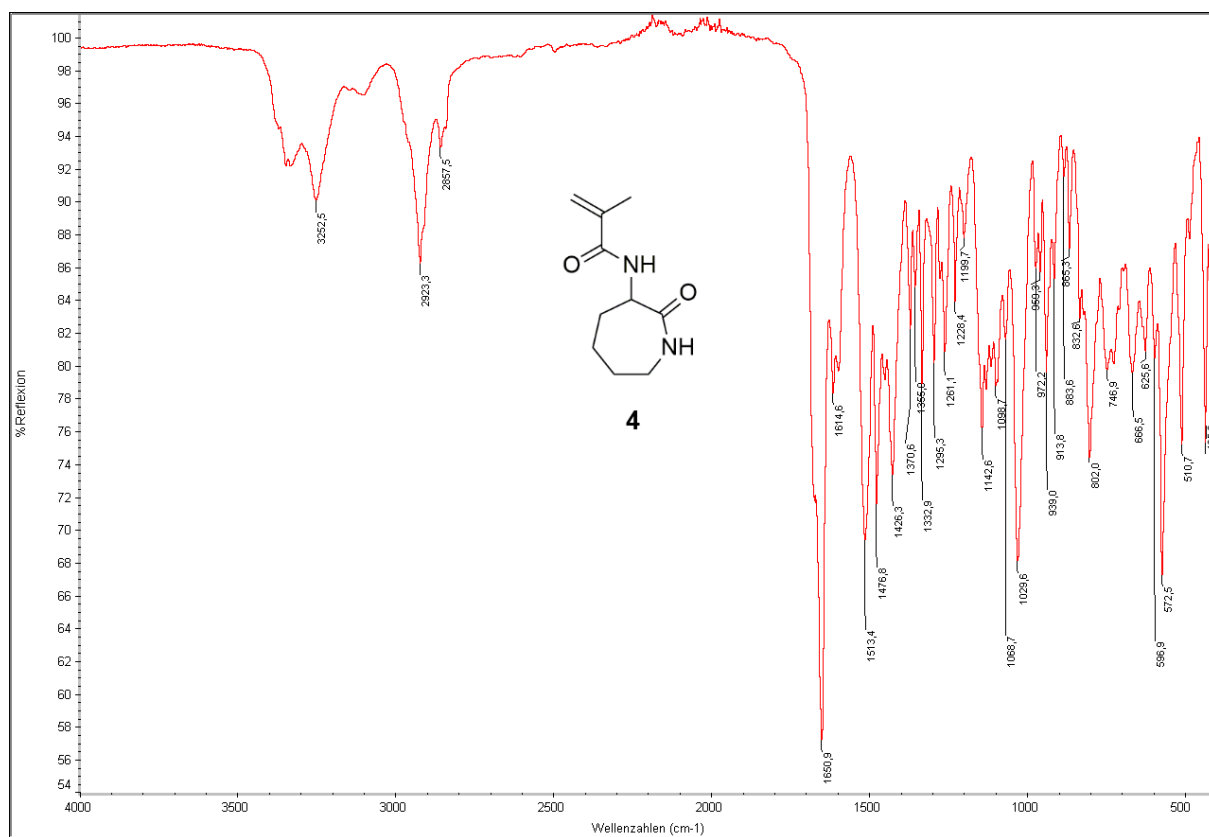

Figure S5: IR spectrum of 2-methacrylamido-caprolactam (**4**) in the solid state.

$^1\text{H}$  NMR spectrum of poly(2-methacrylamido-caprolactam)-co-(*N,N*-dimethylacrylamide) **6b**

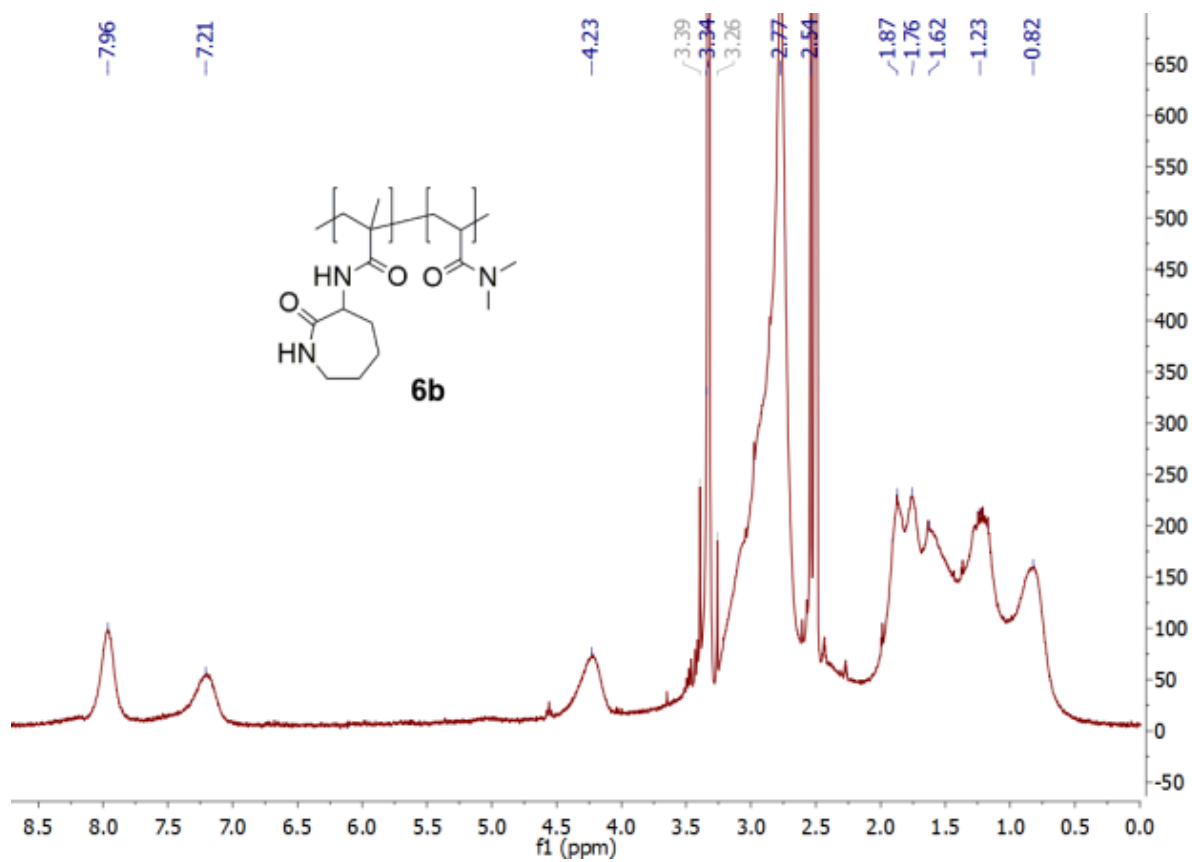

**Figure S6:**  $^1\text{H}$  NMR spectrum of copolymer **6b** in dimethylsulfoxide- $d_6$ .

IR spectrum of poly(2-methacrylamido-caprolactam)-co-(*N,N*-dimethylacrylamide) **6b**

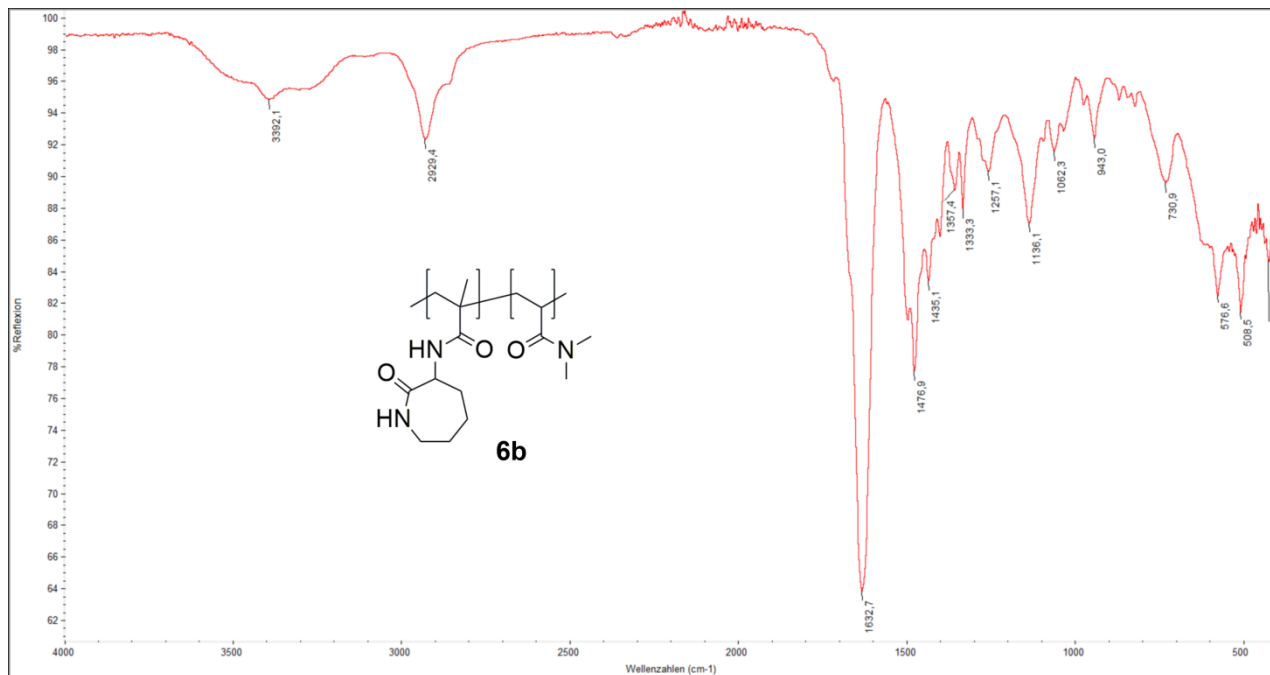

Figure S7: IR spectrum of copolymer **6b** in the solid state.



$^1\text{H}$  NMR spectra of Job plot analysis of RAMEB cyclodextrin with  $\alpha$ -amino- $\epsilon$ -caprolactam (**2**)

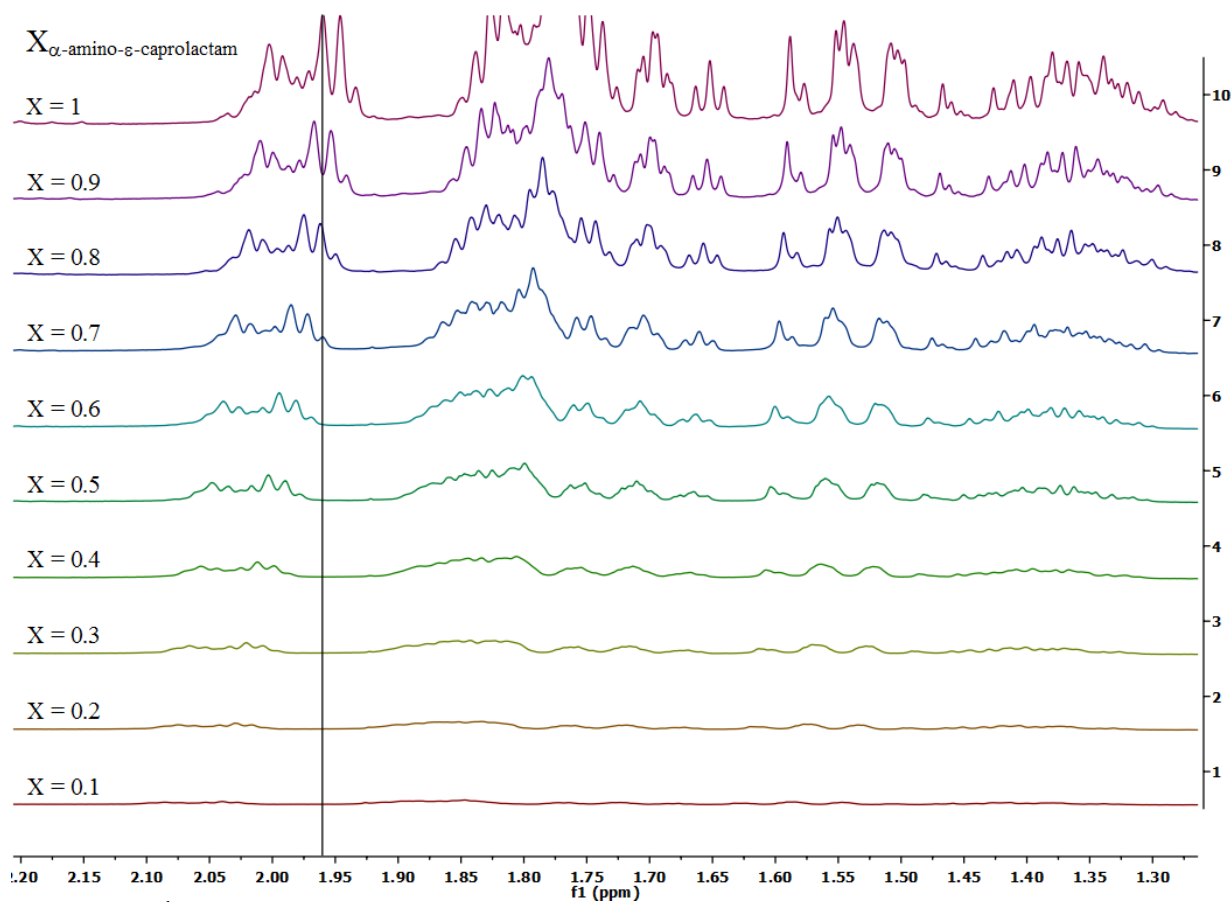

**Figure S8:**  $^1\text{H}$  NMR spectra of complex between RAMEB cyclodextrin and  $\alpha$ -amino- $\epsilon$ -caprolactam (**2**) in  $\text{D}_2\text{O}$ .
